# Supplementary material for: Bezafibrate Improves Insulin Sensitivity and Metabolic Flexibility in STZ-Induced Diabetic Mice
Source: Oxford University Press journal article supplement (doi:10.2337/db15-1670), 2016-06-09
Supplement: db151670supplementarydata2.xlsx [file db151670supplementarydata2.xlsx]

## Sheet: p180 Kit
Supplementary Table 5
Group	Nr	C0	C10	C10:1	C10:2	C12	C12-DC	C12:1	C14	C14:1	C14:1-OH	C14:2	C14:2-OH	C16	C16-OH	C16:1	C16:1-OH	C16:2	C16:2-OH	C18	C18:1	C18:1-OH	C18:2	C2	C3	C3-DC (C4-OH)	C3-OH	C3:1	C4	C4:1	C5	C5-DC (C6-OH)	C5-M-DC	C5-OH (C3-DC-M)	C5:1	C5:1-DC	C6 (C4:1-DC)	C6:1	C7-DC	C8	C9	Ala	Arg	Asn	Asp	Cit	Gln	Glu	Gly
		acylcarnitines	acylcarnitines	acylcarnitines	acylcarnitines	acylcarnitines	acylcarnitines	acylcarnitines	acylcarnitines	acylcarnitines	acylcarnitines	acylcarnitines	acylcarnitines	acylcarnitines	acylcarnitines	acylcarnitines	acylcarnitines	acylcarnitines	acylcarnitines	acylcarnitines	acylcarnitines	acylcarnitines	acylcarnitines	acylcarnitines	acylcarnitines	acylcarnitines	acylcarnitines	acylcarnitines	acylcarnitines	acylcarnitines	acylcarnitines	acylcarnitines	acylcarnitines	acylcarnitines	acylcarnitines	acylcarnitines	acylcarnitines	acylcarnitines	acylcarnitines	acylcarnitines	acylcarnitines	aminoacids	aminoacids	aminoacids	aminoacids	aminoacids	aminoacids	aminoacids	aminoacids
Con, SD	1	17.6	0.116	0.04	0.036	0.039	0.084	0.048	0.042	0.048	0.01	0.007	0.008	0.071	0.006	0.054	0.007	0.01	0.011	0.018	0.09	0.008	0.032	13.7	0.523	0.1	0.131	0.007	1.2	0.029	0.117	0.008	0.019	0.044	0.023	0.014	0.115	0.016	0.015	0.083	0.018	284	70.7	25.2	7.5	36.7	627	28.8	246
Con, SD	2	22	0.105	0.05	0.03	0.032	0.083	0.03	0.028	0.034	0.005	0.006	0.006	0.078	0.01	0.043	0.006	0.007	0.008	0.019	0.076	0.011	0.021	15	1.04	0.155	0.137	0.01	2.78	0.035	0.228	0.016	0.017	0.051	0.025	0.019	0.331	0.015	0.016	0.094	0.022	506	86.2	37.6	8.37	51.6	663	32.9	223
Con, SD	3	16.3	0.091	0.063	0.04	0.047	0.092	0.051	0.039	0.037	0.008	0.008	0.011	0.116	0.009	0.035	0.011	0.007	0.014	0.032	0.08	0.015	0.025	11.4	0.894	0.097	0.133	0.007	1.28	0.027	0.206	0.016	0.023	0.049	0.034	0.009	0.11	0.016	0.018	0.104	0.042	441	124	33.7	9.44	61.7	670	33.5	248
Con, SD	4	41.7	0.107	0.057	0.041	0.044	0.083	0.046	0.035	0.043	0.006	0.007	0.012	0.08	0.007	0.046	0.011	0.008	0.008	0.02	0.082	0.017	0.027	30.4	2.1	0.188	0.145	0.01	4.92	0.035	0.428	0.027	0.02	0.046	0.036	0.012	0.242	0.016	0.018	0.099	0.028	358	126	32.1	10.9	60.7	628	38	277
Con, SD	5	21.8	0.122	0.054	0.034	0.032	0.08	0.04	0.044	0.04	0.011	0.009	0.013	0.103	0.011	0.04	0.007	0.006	0.007	0.026	0.085	0.019	0.03	20.8	1.15	0.158	0.128	0.011	3.51	0.033	0.331	0.022	0.028	0.073	0.023	0.03	0.505	0.018	0.02	0.123	0.042	525	120	33.8	11.7	60.4	699	52.9	244
Con, SD	6	21.9	0.127	0.056	0.04	0.034	0.097	0.048	0.035	0.046	0.01	0.008	0.012	0.087	0.008	0.047	0.009	0.006	0.008	0.021	0.077	0.013	0.029	20.8	0.931	0.159	0.147	0.006	2.75	0.038	0.245	0.018	0.023	0.05	0.029	0.015	0.318	0.015	0.02	0.118	0.022	407	81.1	27.5	6.43	41	579	44.2	220
Con, SD	7	23.1	0.109	0.047	0.04	0.019	0.088	0.039	0.021	0.029	0.005	0.007	0.005	0.059	0.008	0.025	0.007	0.004	0.01	0.014	0.048	0.015	0.013	16.2	0.468	0.091	0.149	0.006	1.14	0.028	0.155	0.012	0.02	0.044	0.023	0.007	0.063	0.013	0.016	0.081	0.014	547	112	45.7	17.2	48.7	695	79.8	312
Con, BEZ	15	28.2	0.082	0.036	0.033	0.025	0.085	0.026	0.018	0.023	0.006	0.004	0.006	0.04	0.003	0.024	0.008	0.004	0.009	0.012	0.054	0.011	0.016	25	1.29	0.217	0.131	0.007	2.69	0.03	0.278	0.016	0.022	0.031	0.025	0.006	0.103	0.011	0.009	0.077	0.01	280	52.8	24.5	5.65	64.1	485	19.6	306
Con, BEZ	16	31.4	0.091	0.053	0.031	0.031	0.077	0.036	0.022	0.027	0.005	0.005	0.005	0.06	0.005	0.039	0.006	0.006	0.008	0.013	0.067	0.007	0.019	28.3	2.8	0.504	0.128	0.008	4.79	0.026	0.948	0.028	0.022	0.041	0.025	0.019	0.379	0.017	0.012	0.078	0.022	643	79.4	46.3	7.2	63.4	573	21.3	238
Con, BEZ	17	22.8	0.07	0.038	0.027	0.03	0.081	0.044	0.027	0.034	0.007	0.005	0.006	0.052	0.007	0.034	0.009	0.005	0.01	0.015	0.076	0.009	0.016	19.8	1.61	0.323	0.135	0.007	2.49	0.027	0.306	0.027	0.023	0.031	0.026	0.013	0.118	0.014	0.018	0.082	0.023	432	95.2	35.8	12.4	60.1	584	52.7	342
Con, BEZ	18	27.3	0.088	0.058	0.034	0.032	0.094	0.039	0.017	0.026	0.006	0.005	0.006	0.037	0.007	0.027	0.007	0.005	0.01	0.012	0.05	0.012	0.012	21.1	0.676	0.154	0.121	0.009	1.29	0.024	0.16	0.018	0.023	0.028	0.029	0.009	0.057	0.013	0.015	0.096	0.023	481	126	43.6	12.5	74	600	54.3	377
Con, BEZ	19	42.2	0.129	0.055	0.034	0.04	0.092	0.043	0.03	0.04	0.008	0.007	0.007	0.082	0.007	0.036	0.007	0.007	0.012	0.021	0.099	0.016	0.028	35.3	1.41	0.287	0.124	0.009	1.91	0.036	0.307	0.018	0.016	0.041	0.032	0.012	0.07	0.016	0.012	0.086	0.036	556	121	44.5	6.22	121	774	20.5	397
Con, BEZ	20	39	0.099	0.056	0.046	0.037	0.095	0.052	0.028	0.042	0.007	0.008	0.01	0.066	0.007	0.036	0.01	0.005	0.012	0.018	0.068	0.019	0.022	30.5	1.04	0.197	0.146	0.007	1.96	0.027	0.273	0.018	0.02	0.025	0.037	0.01	0.069	0.015	0.018	0.082	0.027	295	63.3	23.1	6.96	51.1	495	18.6	331
Con, BEZ	21	31.9	0.1	0.053	0.036	0.021	0.087	0.038	0.022	0.034	0.007	0.006	0.007	0.052	0.007	0.026	0.007	0.005	0.006	0.011	0.06	0.012	0.017	30.7	2.29	0.534	0.121	0.008	5.28	0.038	0.873	0.028	0.022	0.058	0.032	0.016	0.299	0.011	0.016	0.087	0.033	495	137	30.9	6.96	85	675	20.3	225
STZ, SD	29	11.5	0.15	0.057	0.038	0.031	0.093	0.047	0.028	0.016	0.007	0.013	0.007	0.065	0.006	0.026	0.01	0.013	0.01	0.028	0.061	0.011	0.061	12.1	1.34	0.103	0.134	0.007	1.15	0.06	0.332	0.018	0.027	0.052	0.026	0.011	0.08	0.016	0.02	0.086	0.016	1170	152	154	22.4	92.2	863	75.5	363
STZ, SD	30	12	0.218	0.039	0.036	0.029	0.074	0.03	0.018	0.019	0.007	0.007	0.006	0.038	0.005	0.018	0.007	0.004	0.008	0.022	0.04	0.008	0.023	11.8	1.03	0.103	0.127	0.007	1.04	0.068	0.236	0.012	0.024	0.04	0.027	0.012	0.071	0.014	0.012	0.08	0.021	253	48.7	12.2	6.82	63	249	18.6	123
STZ, SD	31	15.8	0.214	0.056	0.041	0.037	0.076	0.048	0.031	0.033	0.01	0.012	0.009	0.077	0.006	0.024	0.008	0.009	0.012	0.036	0.062	0.012	0.057	14.6	1.56	0.177	0.118	0.007	2.74	0.073	0.581	0.015	0.017	0.081	0.025	0.029	0.278	0.013	0.018	0.096	0.036	548	116	44.6	5.59	67	534	34.3	147
STZ, SD	32	13.4	0.179	0.049	0.032	0.03	0.08	0.044	0.018	0.034	0.009	0.011	0.008	0.064	0.007	0.019	0.008	0.011	0.005	0.055	0.057	0.01	0.056	16	2.33	0.211	0.144	0.009	2.42	0.076	0.802	0.014	0.022	0.128	0.034	0.022	0.188	0.019	0.016	0.083	0.032	462	104	43.2	9.44	89.6	505	39.3	213
STZ, SD	40	15.7	0.143	0.06	0.03	0.045	0.073	0.049	0.036	0.039	0.009	0.011	0.009	0.069	0.011	0.033	0.01	0.011	0.01	0.024	0.071	0.011	0.041	15.8	0.908	0.126	0.101	0.008	4.24	0.048	0.293	0.015	0.018	0.071	0.023	0.034	0.727	0.019	0.018	0.122	0.023	511	101	34.8	15.1	66.9	547	71.3	254
STZ, SD	42	8.45	0.171	0.059	0.026	0.056	0.086	0.055	0.047	0.042	0.014	0.02	0.011	0.102	0.008	0.038	0.011	0.017	0.012	0.047	0.103	0.017	0.131	15.7	0.792	0.195	0.127	0.006	2.38	0.061	0.323	0.024	0.02	0.079	0.036	0.027	0.303	0.015	0.022	0.121	0.025	289	66.4	20.8	7.18	71.2	444	23	151
STZ, BEZ	43	19.9	0.141	0.056	0.024	0.036	0.091	0.045	0.021	0.045	0.009	0.006	0.006	0.048	0.003	0.03	0.008	0.006	0.009	0.021	0.068	0.012	0.02	20.7	1.12	0.252	0.121	0.008	2.36	0.039	0.33	0.02	0.022	0.031	0.03	0.009	0.096	0.012	0.019	0.099	0.033	425	105	29	9.21	90.8	447	25.1	188
STZ, BEZ	44	32.7	0.135	0.049	0.033	0.027	0.082	0.033	0.02	0.046	0.005	0.003	0.006	0.042	0.002	0.029	0.008	0.004	0.009	0.018	0.055	0.012	0.024	23.3	2.34	0.289	0.129	0.007	2.74	0.038	0.48	0.028	0.019	0.07	0.026	0.008	0.108	0.015	0.017	0.069	0.026	448	113	29.6	9.6	106	552	34.7	218
STZ, BEZ	45	28.4	0.1	0.052	0.031	0.03	0.082	0.042	0.029	0.055	0.008	0.008	0.003	0.073	0.007	0.062	0.007	0.007	0.008	0.014	0.111	0.011	0.027	27.1	3.37	0.648	0.125	0.01	4.35	0.05	0.619	0.031	0.028	0.04	0.029	0.01	0.203	0.011	0.021	0.084	0.029	354	84	25.1	8.7	73.9	519	35.2	232
STZ, BEZ	46	39.3	0.12	0.053	0.026	0.028	0.09	0.042	0.02	0.035	0.005	0.005	0.004	0.045	0.006	0.034	0.007	0.008	0.009	0.014	0.07	0.007	0.022	30.5	3.2	0.426	0.133	0.008	3.53	0.046	0.622	0.036	0.021	0.073	0.031	0.011	0.136	0.011	0.014	0.077	0.02	509	63.5	38.5	12.7	133	551	60.8	251
STZ, BEZ	49	28.8	0.158	0.053	0.042	0.025	0.078	0.042	0.019	0.032	0.007	0.004	0.007	0.051	0.004	0.025	0.006	0.006	0.006	0.014	0.073	0.008	0.028	18.4	1.39	0.164	0.12	0.008	1.34	0.041	0.382	0.025	0.021	0.063	0.024	0.011	0.044	0.013	0.017	0.085	0.021	518	60.4	45.3	12.8	160	581	49.4	255
*=Samples under 3-times zero values			*	*	*	*	*	*	*		*	*	*		*	*	*	*	*	*		*						*		*		*	*	*	*	*	*	*	*	*	*
[truncated: 178 more columns]
